# Supplementary material for: A proof-of-concept electroreduction-free anodic stripping voltammetry analysis of Ag(i) based on S,N–Ti3C2Tx MXene nanoribbons
Source: Royal Society of Chemistry journal article supplement (doi:10.1039/d3cc04715f), 2023-01-01
Supplement: d3cc04715f1.pdf [file d3cc04715f1.pdf]

## Supporting information

### **A proof-of-concept electroreduction-free anodic stripping voltammetry analysis of Ag(I) based on S,N-Ti<sub>3</sub>C<sub>2</sub>T<sub>x</sub> MXene nanoribbons**

Yifan Zhou,<sup>a,e</sup> Yinhui Yi,<sup>a,b,c</sup> Yong He<sup>c</sup> and Gangbing Zhu<sup>\*a,d</sup>

<sup>a</sup> School of Emergency Management, School of the Environment and Safety Engineering, Jiangsu University, Zhenjiang, 212013, P. R. China. E-mail: zhgb1030@ujs.edu.cn

<sup>b</sup> The Key Laboratory of Synthetic and Biological Colloids, Ministry of Education, Jiangnan University, P. R. China

<sup>c</sup> Laboratory of Spectroscopy Sensing, Ministry of Agriculture and Rural Affairs, Zhejiang University, Hangzhou 310058, P.R. China

<sup>d</sup> Key Laboratory of Optic-electric Sensing and Analytical Chemistry for Life Science, MOE, P.R. China

<sup>e</sup> School of Water, Energy and Environment, Cranfield University, Cranfield, Beds, MK430AL, UK

---

\*Corresponding author.  
E-mail address: zhgb1030@ujs.edu.cn.

## **Experimental**

### **Materials and chemicals**

KOH, LiF, HCl,  $\text{Ti}_3\text{AlC}_2$  and  $\text{AgNO}_3$  were purchased from Sinopharm Chemical Reagent Co., Ltd., whereas L-cysteine (L-cys) was obtained from Shanghai Aladdin Biochemical Technology Co., Ltd. Interfering ion solutions containing metal ions such as  $\text{Ni}^{2+}$ ,  $\text{Pb}^{2+}$ ,  $\text{Co}^{2+}$ ,  $\text{Mn}^{2+}$ ,  $\text{Zn}^{2+}$  and  $\text{Cu}^{2+}$  were prepared using the related metal salts as the raw materials. All electrochemical tests were conducted using a CHI 660E electrochemical workstation in a PBS buffer solution (0.1 M, pH 5.0), unless otherwise specified.

### **Synthesis of S,N-Ti<sub>3</sub>C<sub>2</sub>T<sub>x</sub>R**

To begin with,  $\text{Ti}_3\text{C}_2\text{T}_x\text{S}$  was produced through a top-down etching approach to remove the Al layer of  $\text{Ti}_3\text{AlC}_2$ <sup>1</sup>. Subsequently,  $\text{Ti}_3\text{C}_2\text{T}_x\text{R}$  was prepared using the following procedure: 250.0 mg of  $\text{Ti}_3\text{C}_2\text{T}_x\text{S}$  was added into a 30.0 mL solution of 6.0 M KOH, subjected to ultrasonic oscillation for 15 minutes to achieve uniform dispersion, and then stirred continuously for approximately 4 days. After the completion of the reaction, the formed materials were neutralized through washing, subsequently dried at 60°C to obtain black  $\text{Ti}_3\text{C}_2\text{T}_x\text{R}$  powder.

The final product S,N- $\text{Ti}_3\text{C}_2\text{T}_x\text{R}$  was obtained through a straightforward hydrothermal method involving the dissolution of 20.0 mg L-cys in 30.0 mL  $\text{Ti}_3\text{C}_2\text{T}_x\text{R}$  solution (1.0 mg mL<sup>-1</sup>). This mixture was then transferred to a Teflon-lined stainless-steel autoclave for the hydrothermal treatment of 12 hours. Afterward, the resulting nanomaterial was subjected to centrifuging, filtering, washing, and drying at 60 °C to acquire the desired S,N- $\text{Ti}_3\text{C}_2\text{T}_x\text{R}$  product.

### **EfASV detection of Ag<sup>+</sup> based on S,N-Ti<sub>3</sub>C<sub>2</sub>T<sub>x</sub>R modified electrode**

To prepare the S,N- $\text{Ti}_3\text{C}_2\text{T}_x\text{R}$  modified glassy carbon electrode (S,N- $\text{Ti}_3\text{C}_2\text{T}_x\text{R}/\text{GCE}$ ), the first step involved carefully polishing the GCE with alumina powder and rinsing it with ultrapure water. Then,

9.0  $\mu\text{L}$  S,N-Ti<sub>3</sub>C<sub>2</sub>T<sub>x</sub>R suspension was added dropwise onto the GCE surface. Then, the modified electrode was subsequently dried using an infrared lamp, resulting in the formation of the desired S,N-Ti<sub>3</sub>C<sub>2</sub>T<sub>x</sub>R/GCE. Finally, the EfASV measurement of Ag<sup>+</sup> was conducted in 2-consecutive processes:

(1) Immersing the as-prepared S,N-Ti<sub>3</sub>C<sub>2</sub>T<sub>x</sub>R/GCE in a phosphate-buffered saline (PBS) solution containing Ag<sup>+</sup> for a specific duration;

(2) Electrochemical measurements conducted using DPV in a blank 0.1 M PBS solution.

For comparison, Ti<sub>3</sub>C<sub>2</sub>T<sub>x</sub>S/GCE and Ti<sub>3</sub>C<sub>2</sub>T<sub>x</sub>R/GCE were prepared using identical procedures with above.

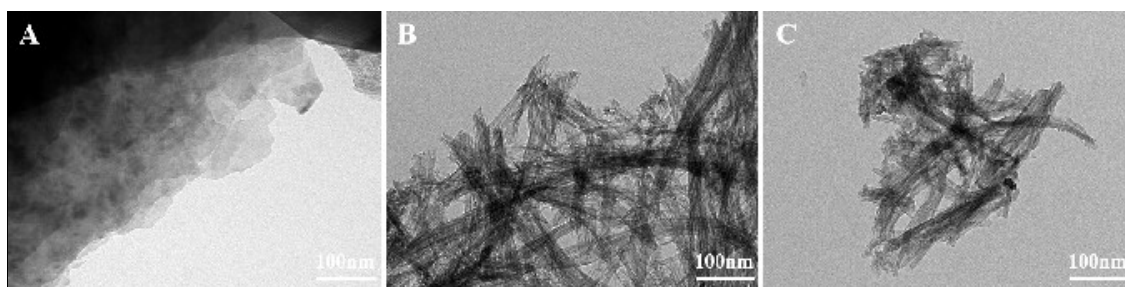

**Figure S1.** TEM images of  $\text{Ti}_3\text{C}_2\text{T}_x\text{S}$  (A),  $\text{Ti}_3\text{C}_2\text{T}_x\text{R}$  (B) and  $\text{S,N-Ti}_3\text{C}_2\text{T}_x\text{R}$  (C).

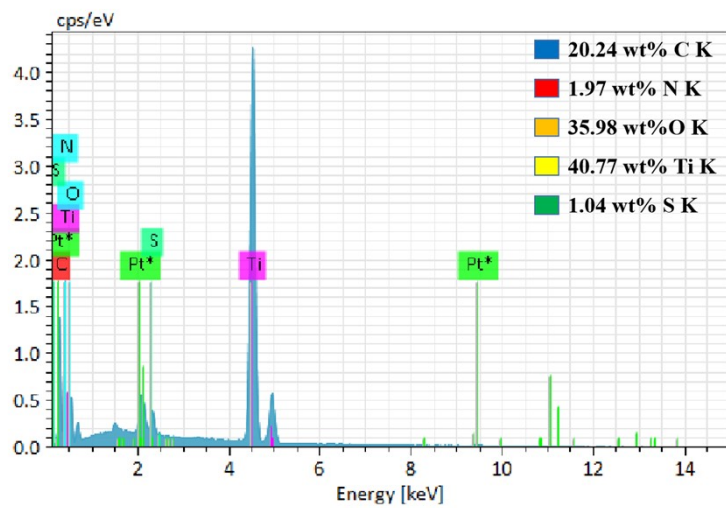

**Figure S2.** EDS analysis of S, N-Ti<sub>3</sub>C<sub>2</sub>T<sub>x</sub>R.

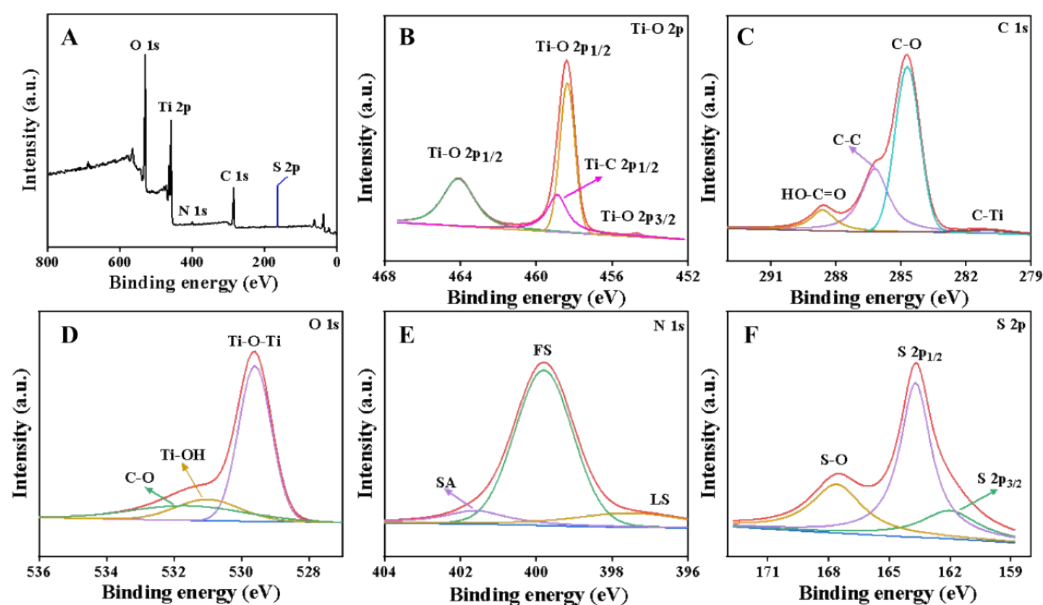

**Figure S3.** (A) XPS spectra of S,N-Ti<sub>3</sub>C<sub>2</sub>T<sub>x</sub>R; high-resolution XPS spectra of (B) Ti 2p spectra, (C) C 1s spectra, (D) O 1s spectra, (E) N 1s spectra, and (F) S 2p spectra of S,N-Ti<sub>3</sub>C<sub>2</sub>T<sub>x</sub>R.

It can be found from Figure S3A that the as-prepared S,N-Ti<sub>3</sub>C<sub>2</sub>T<sub>x</sub>R consists of Ti, O, C, N, and S. Figure S3B confirms the presence of a distinct Ti 2p response which can be further resolved into two binding energies, Ti 2p<sub>1/2</sub> and Ti 2p<sub>3/2</sub>. The distinct peaks at 288.6 eV, 531.1 eV, and 531.8 eV (Figures S3C and S3D) were attributed to the HO-C=O bond, Ti-OH bond, and CO bond, respectively. The characteristic peaks of N 1s (Figure S3E) and S 2p (Figure S3F) indicate the successful inclusion of N and S heteroatoms, and the spectrogram reveals that the N 1s core energy degree is divided into 3 peaks: the peaks at 401.6 eV, 399.5 eV and 397.3 eV which represent graphite N, pyrolysis N and pyridinic N respectively. In particular, the presence of pyridinic N at 397.2 eV is a crucial factor in improving the electrochemical activity and conductivity<sup>2, 3</sup>. Additionally, the presence of C-SO<sub>x</sub>-C (167.6 eV), C-S-C (163.6 eV), and S-Ti (162.0 eV) bonds in Figure 3F verified the effective introduction of sulfur via the existence of S-C bonds.<sup>4, 5</sup>

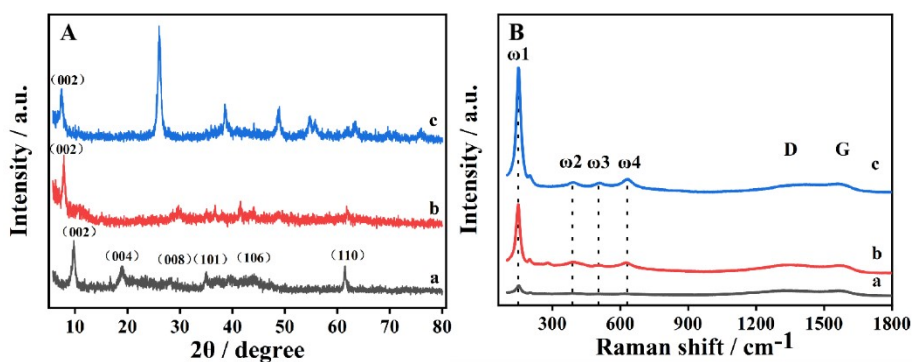

**Figure S4.** (A) XRD patterns and (B) Raman spectra of (a)  $\text{Ti}_3\text{C}_2\text{T}_x\text{S}$ , (b)  $\text{Ti}_3\text{C}_2\text{T}_x\text{R}$  and (c) S,N- $\text{Ti}_3\text{C}_2\text{T}_x\text{R}$ .

The X-ray diffraction (XRD) patterns depicted in Figure S4A provide insights into the structural evolution of the  $\text{Ti}_3\text{C}_2\text{T}_x\text{S}$ ,  $\text{Ti}_3\text{C}_2\text{T}_x\text{R}$ , and S,N- $\text{Ti}_3\text{C}_2\text{T}_x\text{R}$  powders. The peaks observed at  $2\theta$  values of  $28.5^\circ$  and  $44.2^\circ$  correspond respectively to the (008) and (106) planes. After etching, the interlayer spacing of  $\text{Ti}_3\text{C}_2\text{T}_x\text{R}$  expanded, as evidenced through the shift in the (002) diffraction peak from  $2\theta=9.7^\circ$  to  $2\theta=7.9^\circ$ , when compared to  $\text{Ti}_3\text{C}_2\text{T}_x\text{S}$ . Additionally, the doping of S and N resulted in a slight shift of the (002) peak to  $7.3^\circ$  in the synthesized S,N- $\text{Ti}_3\text{C}_2\text{T}_x\text{R}$ , due to the incorporation of heteroelements. This further expanded the interlayer spacing, possibly attributed to the introduction of S, which generated S-O<sub>x</sub> at the edges of  $\text{Ti}_3\text{C}_2\text{T}_x\text{R}$ , thereby creating additional accessible active sites and widening the interlayer spacing. The Raman spectrum was employed to evaluate the structure, molecular interactions and defect level in the synthesized  $\text{Ti}_3\text{C}_2\text{T}_x\text{S}$ ,  $\text{Ti}_3\text{C}_2\text{T}_x\text{R}$ , and S,N- $\text{Ti}_3\text{C}_2\text{T}_x\text{R}$ , the results are shown in the Figure S4B. All three spectra exhibit four distinct peaks: the typical peaks at  $\omega_1$  ( $\sim 150\text{ cm}^{-1}$ ) and  $\omega_3$  ( $\sim 508\text{ cm}^{-1}$ ) arise from the vibration of  $\text{TiO}_2$  anatase phase and Ti atom, while the peaks at  $\omega_2$  ( $\sim 385\text{ cm}^{-1}$ ) and  $\omega_4$  ( $\sim 632\text{ cm}^{-1}$ ) represent non-stoichiometric TiC vibrations. Simultaneously, the Raman spectrum also demonstrates the existence of two prominent peaks at  $\sim 1345\text{ cm}^{-1}$  and  $\sim 1563\text{ cm}^{-1}$ , corresponding to the D band and G band of graphitic C. In general, the D band indicates imperfections in the carbon atom lattice, whereas the G band represents

the  $sp^2$  hybridization of C atom with in-plane stretching vibration. The level of defect structural is commonly quantified by utilizing the intensity ratio of the D and G band ( $I_D/I_G$ ), and a larger  $I_D/I_G$  ratio usually signifies a greater extent of defects. From the figure, the computational findings demonstrate a progressive increase in  $I_D/I_G$  values for  $Ti_3C_2T_xS$ ,  $Ti_3C_2T_xR$ , and  $S,N-Ti_3C_2T_xR$ , with values of 0.891, 0.970, and 0.985 respectively. This indicates a decline in the graphitization level of the material and an enhancement in defect density, confirming the successful synthesis of S,N- $Ti_3C_2T_xR$  with increased vacancies, defects, and more active sites.



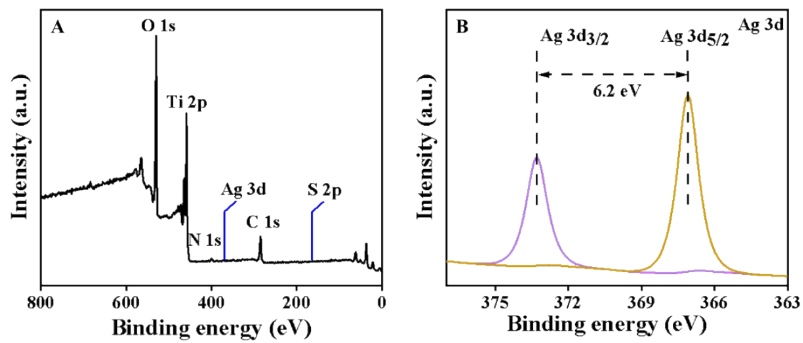

**Figure S5.** (A) XPS spectra of Ag<sup>0</sup>/S,N-Ti<sub>3</sub>C<sub>2</sub>T<sub>x</sub>R and (B) high-resolution XPS spectra of Ag 3d spectra.

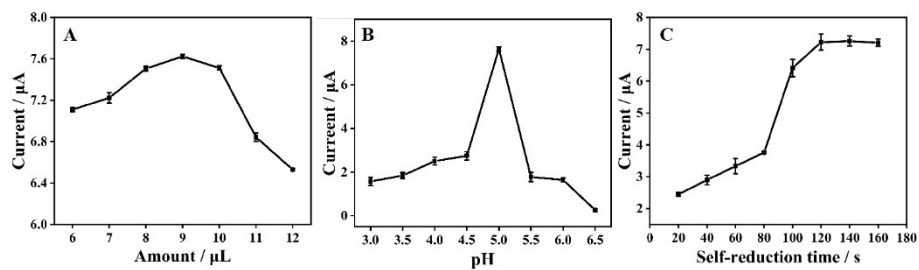

**Figure S6.** The effect of the pH value of PBS (A), the amount of  $\text{S,N-Ti}_3\text{C}_2\text{T}_x\text{R/GCE}$  (B) and the accumulation time (C) on the DPV peak currents of  $\text{Ag}^+$  ( $2.0 \mu\text{M}$ ).

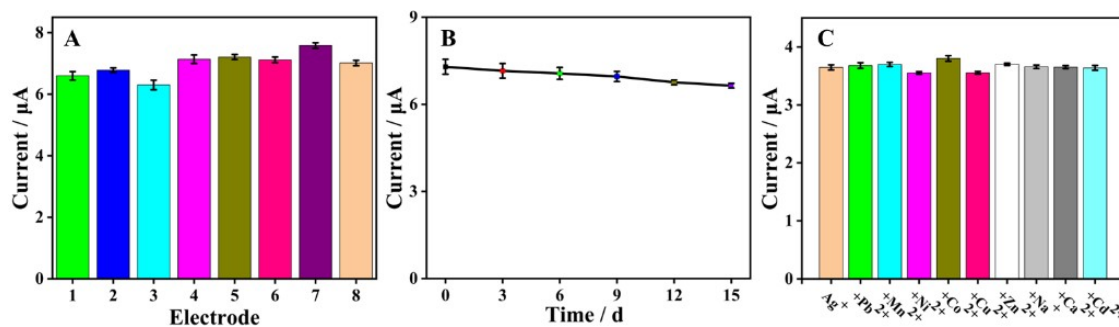

**Figure S7.** (A) The peak current values of 8 independently fabricated S,N-Ti<sub>3</sub>C<sub>2</sub>T<sub>x</sub>R/GCE towards Ag<sup>+</sup> (2.0  $\mu\text{M}$ ), (B) the stability test of S,N-Ti<sub>3</sub>C<sub>2</sub>T<sub>x</sub>R/GCE/GCE for Ag<sup>+</sup> (2.0  $\mu\text{M}$ ) and (C) the peak current values of S,N-Ti<sub>3</sub>C<sub>2</sub>T<sub>x</sub>R/GCE/GCE towards Ag<sup>+</sup> (0.2  $\mu\text{M}$ ) containing various ions (2.0  $\mu\text{M}$ ).

Initially, a total of eight separate S,N-Ti<sub>3</sub>C<sub>2</sub>T<sub>x</sub>R/GCEs was prepared by using similar method, and the DPV signal of Ag<sup>+</sup> was subsequently measured simultaneously in 0.1 M PBS. The findings in Figure S7A demonstrated a relative standard deviation (RSD) of 3.72% for the DPV current, indicating the favorable reproducibility of the S,N-Ti<sub>3</sub>C<sub>2</sub>T<sub>x</sub>R/GCE. Subsequently, we assessed the sensor stability by storing S,N-Ti<sub>3</sub>C<sub>2</sub>T<sub>x</sub>R/GCE at 4 °C for two weeks (Figure S7B). The findings confirmed that the peak current response for Ag<sup>+</sup> remained at 91.1% of its initial value, indicating the outstanding stability of the sensor. Moreover, the selectivity of S,N-Ti<sub>3</sub>C<sub>2</sub>T<sub>x</sub>R/GCE was examined by introducing various interfering substances in the test samples. The result display that the presence of ions including Pb<sup>2+</sup>, Mn<sup>2+</sup>, Ni<sup>2+</sup>, Co<sup>2+</sup>, Cu<sup>2+</sup>, Zn<sup>2+</sup>, Na<sup>+</sup>, Ca<sup>2+</sup>, and Cd<sup>2+</sup> (2.0  $\mu\text{M}$ ) did not affect the results when using S,N-Ti<sub>3</sub>C<sub>2</sub>T<sub>x</sub>R/GCE to detect Ag<sup>+</sup> (0.2  $\mu\text{M}$ ), indicating its strong capability to resist interference, as displayed in Figure S7C.

**Table S1.** Comparisons between the present EfASV sensor and previously reported ASV sensors for Ag<sup>+</sup> detection.

| Sensors                                                 | Electrodeposition | Linear range / $\mu\text{M}$ | LOD / nM | Ref       |
|---------------------------------------------------------|-------------------|------------------------------|----------|-----------|
| Au@4-ATP/Au                                             | -0.54V, 350s      | 0.005–3.0                    | 13       | 6         |
| PANI/SSA/GCE                                            | -0.45V, 100s      | 0.01-100                     | 3.4      | 7         |
| Cr/CPE                                                  | -1.3V, 100s       | 0.028-0.093                  | 9.3      | 8         |
| GaN micropillar electrode                               | -0.1V, 180s       | 0.093-9.3                    | 30       | 9         |
| LB/PAn-PTSA/GCE                                         | -0.56V, 200s      | 0.006-1.0                    | 0.4      | 10        |
| MWCNTs/CPE                                              | -0.7V, 20s        | 0.0046-2.2                   | 0.74     | 11        |
| Schiff/CPE                                              | -0.7V, 20s        | 0.0046-1.8                   | 0.85     | 12        |
| 4-tert-butyl-1thiacalix [4] arene                       | -0.6V, 30s        | 0.05-30.0                    | 10       | 13        |
| mag-IIP-NPs/CPE                                         | -0.8V, 40s        | 0.0046-1.4                   | 1.4      | 14        |
| CNTs/GCE                                                | 0.3V, 240s        | 0.1-2.5                      | 30       | 15        |
| BiEF/GCE                                                | -0,8V, 60s        | 0.093-0.83                   | 19       | 16        |
| ABP/GA/4-NBD/GCE                                        | -0.6V, 180s       | 0.05-1.0                     | 25       | 17        |
| BHAB-MCPE/CPE                                           | -0.9V, 300s       | 0.01-2.0                     | 6.7      | 18        |
| N-CNT/GO <sub>x</sub>                                   |                   | 0.02-0.2                     | 1.8      | 19        |
| p-isopropylcalix[6]arene/CPE                            | -0.25V, 180s      | 0.05-2.0                     | 48       | 20        |
| S,N-Ti <sub>3</sub> C <sub>2</sub> T <sub>x</sub> R/GCE | Free              | 0.002-4.0                    | 0.667    | This work |

**Table S2.** The determination of Ag<sup>+</sup> in real samples.

| Sample     | Spiked / $\mu\text{M}$ | Found / $\mu\text{M}$ | Recovery / % | RSD / % |
|------------|------------------------|-----------------------|--------------|---------|
| Lake water | 0.02                   | 0.021                 | 105.0        | 3.23    |
|            | 0.2                    | 0.218                 | 109.0        | 3.42    |
|            | 2.0                    | 1.980                 | 99.0         | 5.14    |
| Tap water  | 0.02                   | 0.019                 | 95.0         | 4.57    |
|            | 0.2                    | 0.197                 | 98.5         | 4.11    |
|            | 2.0                    | 2.13                  | 106.5        | 4.05    |

## References

- 1 J. Liu, X. Jiang, R. Zhang, Y. Zhang, L. Wu, W. Lu, J. Li, Y. Li and H. Zhang, *Advanced Functional Materials*, 2019, **29**, 1807326.
- 2 Q. Guan, J. Ma, W. Yang, R. Zhang, X. Zhang, X. Dong, Y. Fan, L. Cai, Y. Cao and Y. Zhang, *Nanoscale*, 2019, **11**, 14123-14133.
- 3 C. Lu, L. Yang, B. Yan, L. Sun, P. Zhang, W. Zhang and Z. Sun, *Advanced Functional Materials*, 2020, **30**, 2000852.
- 4 W. Zhu, J. Gao, H. Song, X. Lin and S. Zhang, *ACS applied materials interfaces*, 2019, **11**, 44545-44555.
- 5 Z. Guo, P. Ren, J. Wang, X. Hou, J. Tang, Z. Liu, Z. Chen, Y. Jin and F. Ren, *Chemical Engineering Journal*, 2023, **451**, 138667.
- 6 Z. Xiao, H. Meng, X. Qin, X. Sang, Y. Zhang and Y. Yuan, *Analyst*, 2021, **146**, 597-604.
- 7 F. Hashemi and A. R. Zanganeh, *Journal of Electroanalytical Chemistry*, 2016, **767**, 24-33.
- 8 Z. Koudelkova, T. Syrový, P. Ambrozova, Z. Moravec, L. Kubac, D. Hynek, L. Richtera and V. Adam, *Sensors*, 2017, **17**, 1832.
- 9 Q. Liu, J. Li, W. Yang, X. Zhang, C. Zhang, C. Labbé, X. Portier, F. Liu, J. Yao and B. Liu, *Analytica chimica acta*, 2020, **1100**, 22-30.
- 10 Q. Liu, F. Wang, Y. Qiao, S. Zhang and B. Ye, *Electrochimica acta*, 2010, **55**, 1795-1800.
- 11 S. Jahandari, M. A. Taher, H. Fazelirad and I. Sheikhshoai, *Microchimica Acta*, 2013, **180**, 347-354.
- 12 H. H. Nadiki, M. A. Taher, H. Ashkenani and I. Sheikhshoai, *Analyst*, 2012, **137**, 2431-2436.
- 13 F. Wang, C. Xin, Y. Wu, Y. Gao and B. Ye, *Journal of Analytical Chemistry*, 2011, **66**, 60-65.
- 14 M. Ghanei-Motlagh and M. A. Taher, *Microchimica Acta*, 2017, **184**, 1691-1699.

- 15 X. Liu, W. Li, Q. Shen, Z. Nie, M. Guo, Y. Han, W. Liu and S. Yao, *Talanta*, 2011, **85**, 1603-1608.
- 16 T. Romih, S. B. Hočevár, A. Jemec and D. Drobne, *Electrochimica Acta*, 2016, **188**, 393-397.
- 17 M.-C. Radulescu, A. Chira, M. Radulescu, B. Bucur, M. P. Bucur and G. L. Radu, *Sensors*, 2010, **10**, 11340-11351.
- 18 M. Gholivand and M. Parvin, *Electroanalysis*, 2010, **22**, 2291-2296.
- 19 I. M. Rust, J. M. Goran and K. J. Stevenson, *Analytical chemistry*, 2015, **87**, 7250-7257.
- 20 J. B. Raoof, R. Ojani, A. Alinezhad and S. Z. Rezaie, *Monatshefte für Chemie-Chemical Monthly*, 2010, **141**, 279-284.
